# Supplementary material for: Development and characterization of a multiplex panel of microsatellite markers for the Reunion free-tailed bat Mormopterus francoismoutoui
Source: PeerJ. 2019 Dec 12;7:e8036. doi: 10.7717/peerj.8036 (PMC6911689; doi:10.7717/peerj.8036)
Supplement: Supplemental Information 1 [file peerj-07-8036-s001.xlsx]

## Sheet: Feuil1
Sample_ID	Field_Number	Sample_Type	Collection_Date	Colony_ID	Xcoo	Ycoo	used_for
RB320	RB320	cDNA from pooled kidney/spleen/lung	2015-02-04	1	55.64301	-20.98112	library production
RB321	RB321	cDNA from pooled kidney/spleen/lung	2015-02-04	1	55.64301	-20.98112	library production
RB322	RB322	cDNA from pooled kidney/spleen/lung	2015-02-04	1	55.64301	-20.98112	library production
RB323	RB323	cDNA from pooled kidney/spleen/lung	2015-02-04	1	55.64301	-20.98112	library production
RB324	RB324	cDNA from pooled kidney/spleen/lung	2015-02-04	1	55.64301	-20.98112	library production
RB325	RB325	cDNA from pooled kidney/spleen/lung	2015-02-04	1	55.64301	-20.98112	library production
1064RU	SMG18120	cDNA from pooled kidney/spleen/lung	2013-03-04	2	55.2596	-21.1103	library production
1145RU	SMG18163	cDNA from pooled kidney/spleen/lung	2013-03-04	2	55.2596	-21.1103	library production
1147RU	SMG18131	cDNA from pooled kidney/spleen/lung	2013-03-04	2	55.2596	-21.1103	library production
1148RU	SMG18122	cDNA from pooled kidney/spleen/lung	2013-03-04	2	55.2596	-21.1103	library production
1149RU	SMG18123	cDNA from pooled kidney/spleen/lung	2013-03-04	2	55.2596	-21.1103	library production
1154RU	SMG18114	cDNA from pooled kidney/spleen/lung	2013-03-04	2	55.2596	-21.1103	library production
MF001	MF001	DNA from wing punch	2018-10-26	3	55.479158	-21.317088	biological validation of primers
MF002	MF002	DNA from wing punch	2018-10-26	3	55.479158	-21.317088	polymorphism analysis
MF019	MF019	DNA from wing punch	2018-10-29	4	55.26685	-21.01537	polymorphism analysis
MF020	MF020	DNA from wing punch	2018-10-29	4	55.26685	-21.01537	polymorphism analysis
MF077	MF077	DNA from wing punch	2018-11-07	5	55.475659	-21.029868	polymorphism analysis
MF081	MF081	DNA from wing punch	2018-11-07	5	55.475659	-21.029868	biological validation of primers + multiplexing
MF134	MF134	DNA from wing punch	2018-11-08	6	55.50951	-20.8935	polymorphism analysis
MF136	MF136	DNA from wing punch	2018-11-08	6	55.50951	-20.8935	polymorphism analysis
MF141	MF141	DNA from wing punch	2018-11-08	6	55.50951	-20.8935	biological validation of primers + multiplexing
MF195	MF195	DNA from wing punch	2018-11-15	2	55.2596	-21.1103	biological validation of primers + multiplexing
MF196	MF196	DNA from wing punch	2018-11-15	2	55.2596	-21.1103	polymorphism analysis
MF197	MF197	DNA from wing punch	2018-11-15	2	55.2596	-21.1103	polymorphism analysis
MF247	MF247	DNA from wing punch	2018-11-23	7	55.363903	-21.279678	biological validation of primers + multiplexing
MF251	MF251	DNA from wing punch	2018-11-23	7	55.363903	-21.279678	polymorphism analysis
MF252	MF252	DNA from wing punch	2018-11-23	7	55.363903	-21.279678	polymorphism analysis
MF310	MF310	DNA from wing punch	2018-11-27	8	55.748154	-21.12477	biological validation of primers + multiplexing
MF312	MF312	DNA from wing punch	2018-11-27	8	55.748154	-21.12477	polymorphism analysis
MF313	MF313	DNA from wing punch	2018-11-27	8	55.748154	-21.12477	polymorphism analysis
MF378	MF378	DNA from wing punch	2018-11-30	9	55.248998	-21.058724	polymorphism analysis
MF379	MF379	DNA from wing punch	2018-11-30	9	55.248998	-21.058724	polymorphism analysis
MF395	MF395	DNA from wing punch	2018-12-03	10	55.82373	-21.16131	biological validation of primers + multiplexing
MF403	MF403	DNA from wing punch	2018-12-03	10	55.82373	-21.16131	polymorphism analysis
MF404	MF404	DNA from wing punch	2018-12-03	10	55.82373	-21.16131	polymorphism analysis
MF447	MF447	DNA from wing punch	2018-12-04	11	55.21908	-21.03825	biological validation of primers + multiplexing
MF450	MF450	DNA from wing punch	2018-12-04	11	55.21908	-21.03825	polymorphism analysis
MF451	MF451	DNA from wing punch	2018-12-04	11	55.21908	-21.03825	polymorphism analysis
MF489	MF489	DNA from wing punch	2018-12-05	12	55.249873	-21.071146	polymorphism analysis
MF517	MF517	DNA from wing punch	2018-12-06	13	55.55205	-20.902835	polymorphism analysis
MF518	MF518	DNA from wing punch	2018-12-06	13	55.55205	-20.902835	polymorphism analysis
MF561	MF561	DNA from wing punch	2018-12-07	14	55.82373	-21.16131	polymorphism analysis
MF562	MF562	DNA from wing punch	2018-12-07	14	55.82373	-21.16131	polymorphism analysis
