# Supplementary material for: Development and characterization of a multiplex panel of microsatellite markers for the Reunion free-tailed bat Mormopterus francoismoutoui
Source: PeerJ. 2019 Dec 12;7:e8036. doi: 10.7717/peerj.8036 (PMC6911689; doi:10.7717/peerj.8036)
Supplement: Supplemental Information 2 [file peerj-07-8036-s002.xlsx]

## Sheet: Dietrich_12microsat
Locus name	Repeat number	Motif	Primer left sequence	Primer right sequence	Sequence
MF_loc03	21	GT	GGTGGTGTTCTGATACGAGTGT	TGACAGTTACCCATCCACCC	TTTCTTGTTAACACAACCTCCCACTGGGTTTTCCTCCCAGCTTTATTGAGATATGATTGACAAATTaaaaaGTGtatataGTTAAGGTATACAAGGTGGTGTTCTGATACGAGTGTACCTTAGGCAATAATTACCACAGTCAAGCTAATTAACATACCCATCGCTTCGCATAGTTGCCgtgtgtgtgtgtgtgtgtgtgtgtgtgtgtgtgtgtgtgtgtGGTGCCATTGGTTTTCAATGTTCCAGTCATCTTTGATCGCAGAACCTAGCACATGTTAGGTGCTTAAGTAATAGAACGTGAATAAATGAATACATGACTGGGTGGATGGGTAACTGTCAAGACGAAAGACTGTTagagagG
MF_loc04	21	TG	CCTTGTCTCCTGGCCTCATT	ACTGTGCCAATTATAATCCTCCC	TATGTCTaaaaaGATGCCATTACTAACTCTTGCATCCCTTGTCTCCTGGCCTCATTCTTTCTAATGTACACAGGCATTCCCATATACCATCAAGGATGGTTGCGTGCCTCtgtgtgtgtgtgtgtgtgtgtgtgtgtgtgtgtgtgtgtgtgTTGAGCTGCAAGAGGAATTGAGAGCTGTCTTTCAACCTCCAACGCAGAAAATTGCAGGGGAGGATTATAATTGGCACAGTTTGCATcacacaTATCTTTGCAGGTGATTCCATATTATGACTAGTCCAGCGTGTATTACACGCCCAGCCTATGACTGGAGATGAGGACAGAACAGTGTTTGATAATCCACAGTCACATgggggATAGGG
MF_loc05	20	GT	CCAGGAAAGCTGGGTGAAGA	TGGTTTCCCAGCTCACTTCC	aaaaaaGGATACTAGTGGaaaaaCTGGTGAAATCTAATAAAgtgtgtAGTTAGTTAATAGTATTGTGCCAATATTAACTTCTTATTTTGACAAATGTACCAGGAAAGCTGGGTGAAGAGTATACAGAAATTCTGTCATTTTCAAATTTTCTGTATACTAAAATTATTTCAAAATAAATATTTTGAAATATAATTGTGCTATGACTTTAGAATGTAACTATGCACTGATACTCgtgtgtgtgtgtgtgtgtgtgtgtgtgtgtgtgtgtgtgtAGATAGCACAGGGGCAACAGAAATGAAGGAAAAGAGACAGTGAATCTTCAACAGATCAAACTGGAAAAGGGAAGTGAGCTGGGAAACCACAATTAAGCCA
MF_loc06	20	CA	ACCCACGACATTCAGCCTTC	AGAGCTTGGGACCCTGTACT	ATCTGATATCAGGATGGGAGGCAGAAACTGGGATATTAGACCCACGACATTCAGCCTTCGATAAGCAACATAGTTAAATTACAGTGAGAAGAAAGTGTGCATTAGTcacacacacacacacacacacacacacacacacacacacaTTTTCTCCATGCACCTTATGACAGACTGCTGAGGAATTACTAGCATGAATCCAGTACAGGGTCCCAAGCTCTTCCTTTTGAGAAAATACAATAGCTCTGAttttttAAAGAGCAtttttATTTTGTGCCTCATTCCACTATCAACATTTCACAGTGTCGTGAGCCCACTGGCCCAATTGGTCCTTCTTAGGCAGTTTCCCGACAGTGTTGAAATGGCAGGTGTATGA
MF_loc07	20	AC	CGCAGCAATTCTCCCAGGA	CCTTCTGTATAAGGCTGGTGT	AGTTTAATTATTTAAATTACTACTCTATTCAGCCCAGGGATTCTCCTCCCCGCAGCAATTCTCCCAGGAGGGAGACCTTGTATCCACTTCCCAAAGacacacacacacacacacacacacacacacacacacacacGCAGAAGGTCTTGAATATTCTAACACCAGCCTTATACAGAAGGCACTTAATGAGTGTTTGTGGAATAATTGACCAGTGGAttttttAGAAGAGAAGAGGCTGTGGGGAGGGCAGGTACTTTTACTGATAAATCAATGATATGTAATAACTATTTGAGCGCTGTGAATCTTGGGAAGGTACTCTGGGACAGACTGGGGAGGGCCCGGAGTGCCAGGGTAAGgtgtgtGGAGAGCCAAGGTTGTTGAGTTGAAGAGTGACCAGGA
MF_loc11	18	GT	TCTCTGTGGCTGCATCAGTC	AGAGTCGCATCCAGAAAGATGT	GTTTGGTTGTTTTAACCCAAAGAAGTTGCtttttGTGTTTTCACTTTCTCTGTGGCTGCATCAGTCTATTCACTGTTTTATCCAAATCTGTGCCACTTCTGGCATAGCCAGGCCCTGGCTCCGTGCGGTGCCGTTGCCGCgtgtgtgtgtgtgtgtgtgtgtgtgtgtgtgtgtgtGATGTACTGACACCGCCTTGTAAACCATCACAGCAGCTCAGTTCTGTTTAGTTATCGCAGTGCTAAGTATAGTTAATTAAatatatGCAGAAGATTCTAGATTTTATGTGTCTAGAACTCGCATTTGCTAAACATCTTTCTGGATGCGACTCTAACTCACAATATTGTGGATTT
MF_loc13	18	GT	CTTTCCTCCCTTTCCCGAGG	GAACCCTCCTTGAGTGAGCC	AGCTGCGTGCCACGGACTTGGCATGTGGGCTCCTCCTGTCACTGCCAGCCACTGCCAGCCACTGCTAACAGAAAATTCATTCTGTTATcacacaGGCTGAGAGGGCAGCCACAGcccccAGCTTTCCTCCCTTTCCCGAGGTTTTCCCACTAGTAATGGTCCTCAGCCCTGACTTATAGGCTTTACCCGAACACCAAATGGAACAAGCTGTACCgtgtgtgtgtgtgtgtgtgtgtgtgtgtgtgtgtgtGACAGAAGGAGAGGGACCAGATTTCAAACACGTGCTTAGAAATGACAACGCAGAAGTAGTGAGCACAGCAAGCCCACCACGGCTCACTCAAGGAGGGTTCCTGCGGTCCCTTCTAAGTGCAGACCCTACG
MF_loc14	17	AC	GACCGAGGCAGGAATAGAGT	GGCAGGCGAGGCTAAGTTAT	GCTACAAATaaaaaTTCAAACACCAGTTTGGGGTATTTACACCAGTTTTAAACATTAGAGTTAAAGACCGAGGCAGGAATAGAGTTGAGTAGGCTGGACAAACACAGCCTTTGATGGTATGTacacacacacacacacacacacacacacacacacTCCTCCTCAGTGATAAGACTGAGAACCAAGCTAGAACCCAGGTGTTCTGACTGCTCATCCAGTGCCCATGTAGtatataAATACAGATGCTCCTTGACTTACGACGGGGTTACATCCCATTAAAATCATCCTAGGTTGAAAATGTAATTCAAAATGCATTTAATACAGCTAACCTACTGAACCCCATAACTTAGCCTCGCCTGCCTTGAATGTGCTC
MF_loc15	17	TG	AGCTCATAATATACCATGCTGACA	TCTCAGGATGTCTGGCTCCA	tatataCATTATCTCCCTAAATCTTCACAATGGTCTTGAGTaaaaaTTTCATTTCACAGATATGAATTTCAAAACTGGAAAGATTTAGTAGCTTGCAAAAGGATAAACAGCTAGCAAATGGAGAACAAACACAAGATTCTAGTCAAGAGATCTGCTATcacacacaGATCTAGCTCATAATATACCATGCTGACATGTTTAGATTAGGTTTTCAATTACTGAGACATtgtgtgtgtgtgtgtgtgtgtgtgtgtgtgtgtgATTGTTACAgtaggtaggtagTTAGTTATTAACAAAGGAATGGAGCAAATGGAGCCAGACATCCTGAGAAGGCAAGCCAGGTGCAGACAAcccccTTAGGCAGTGCAGAGACCCCGCCCC
MF_loc18	16	CA	GCTTAGGGAGCCCTATGTTGT	GCAAGTGGTTTCTGTTTCTGC	CCTACTCTTCGATCCTTGATGCTGAGGCTGTCATTGCCCTCAGTGACCACTTGGTCAAAGATTTCCTGATATAATGATGAATTTGATTACAAAACAGTCCACATGTCTTTCAAGGAGTAAGAGTTCCCGGGACCACCAGTTTCAGCATTAACAAAGGAAGAagagagagGTCCCAGCTGCTCAGGAATCCATGCCCAGCTCAGTTTTCTAacacacTGGGAATTTCCCATCCTCCACCCATTTCCATCCCAGACTTCCTAAAGTAGGAAAGTGGCTTAGGGAGCCCTATGTTGTcacacaCCATCAATACAGTATACTGTACTCcacacacacacacacacacacacacacacacaTAAGATGATTGACGGCTTAAAGCAGAAACAGAAACCACTTGCTG
MF_loc28	12	AC	GGACTACAGACTTCCGTGCT	GCTGCCTGGTGAATTGCTTT	CCGCTCTGCTCCACCTGGTGGCTGCAGTGCTGTATGTGGGTGAGGTCACTGTTgggggAGGGACCAGCAGGAcccccAAGGGCACCACAcccccTTTCAACTGGCAGAGGTGGCAGCTTTGCTTGGAATGATATAGAGGAATAtttttCTAAAGCATAGCGGGCAGGGGATGAGGGCATGTCAGGTTCATTTTCTAGACTCAGGACTACAGACTTCCGTGCTACAAAATGAGGCAAAGCACTAATCAACTTCTTTTCTCCTgaggaggagCCAGCCCCTAacacacacacacacacacacacacTCAGCTGCTTCCACCCTCTGCACACGTGGAGCTCACGCTAACTATCTGAAGTAAGCAAAAGCAATTCACCAGGCAGCGGG
MF_loc36	10	TCAT	CCAAAGGACTCGCTCGTCTT	GGCCGTACCCACATTAAATTCA	CTGTGAACTTTAATTTCTTCCAAAGGACTCGCTCGTCTTTATTTGGATGGTTGAAGCCAAGAAGGAATTAGAGCTAACCTTTGTCTAGTCTTGTTTGTCTTAGTCCTGAGTTGTCTTACCTATAacacacTATCTATTGGGTTTAGGGTATAAACTTTATATTCATTCACTCACTCATTCACtcattcattcattcattcattcattcattcattcattcatTCAGATATTTATCAAAGatatatCAGGCACCTCCTCTGGGGAAAGCACTGGTGAACATACAGAGATGAATTTAATGTGGGTACGGCCCATGACAATTTAATGGGAAGGTTCACAGTTGTAAATTACAGTAGCTC
